# Supplementary material
Source: Springer Nature journal article supplement (https://www.springermedizin.de/resource/supplementary/12885_2011_3325_MOESM3_ESM.pdf/9463452)
Supplement: MOESM3 [file 9463452]

**Supplemental Table 3. Distribution of cell cycle phase**

| MIA Paca2 | subG1(%)                       | G0/G1(%)                   | S (%)                           | G2/M (%)                    |
|-----------|--------------------------------|----------------------------|---------------------------------|-----------------------------|
| mock1     | 0.69±0.07                      | 46.23.48±32.32             | 25.04±1.62                      | 32.26±1.26                  |
| mock10    | 1.6±0.6                        | 41.24±0.52                 | 24.9±2.37                       | 28.05±2.65                  |
| HOPX8     | 0.93±0.22                      | 72.07±4.29 <sup>*,**</sup> | 13.62±0.45 <sup>**,***</sup>    | 13.37±4.38 <sup>*,**</sup>  |
| HOPX6     | 2.32±0.29 <sup>****</sup>      | 38.82±0.15 <sup>*,**</sup> | 25.3±0.44                       | 33.57±0.56                  |
| HOPX5     | 2.16±0.22 <sup>**</sup>        | 38.89±5.39                 | 26.35±1.26                      | 32.6±5.04                   |
| PANC-1    | subG1(%)                       | G0/G1(%)                   | S (%)                           | G2/M (%)                    |
| mock12    | 1.54±0.17                      | 62.1±0.3                   | 17.44±0.2                       | 18.9±0.387                  |
| mock7     | 0.72±0.09                      | 58.05±0.7                  | 19.29±0.49                      | 21.92±0.35                  |
| HOPX13    | 3.66±0.19 <sup>****,****</sup> | 59.5±0.56 <sup>*,*</sup>   | 10.89±0.27 <sup>****,****</sup> | 25.92±0.79 <sup>***,*</sup> |
| HOPX16    | 1.17±0.19                      | 62.76±2.55 <sup>*</sup>    | 14.2±0.61 <sup>****,****</sup>  | 21.85±0.45 <sup>*</sup>     |
